# Supplementary material for: Chemdex: quantification and distributions of valence numbers, oxidation numbers, coordination numbers, electron numbers, and covalent bond classes for the elements
Source: Royal Society of Chemistry journal article supplement (doi:10.1039/d3dt03738j), 2023-12-13

Chemdex summary data: percentages of valence numbers, oxidation numbers, coordination numbers, electron numbers, X numbers, L numbers, Z numbers, and bond numbers for the elements (data set December 2023)

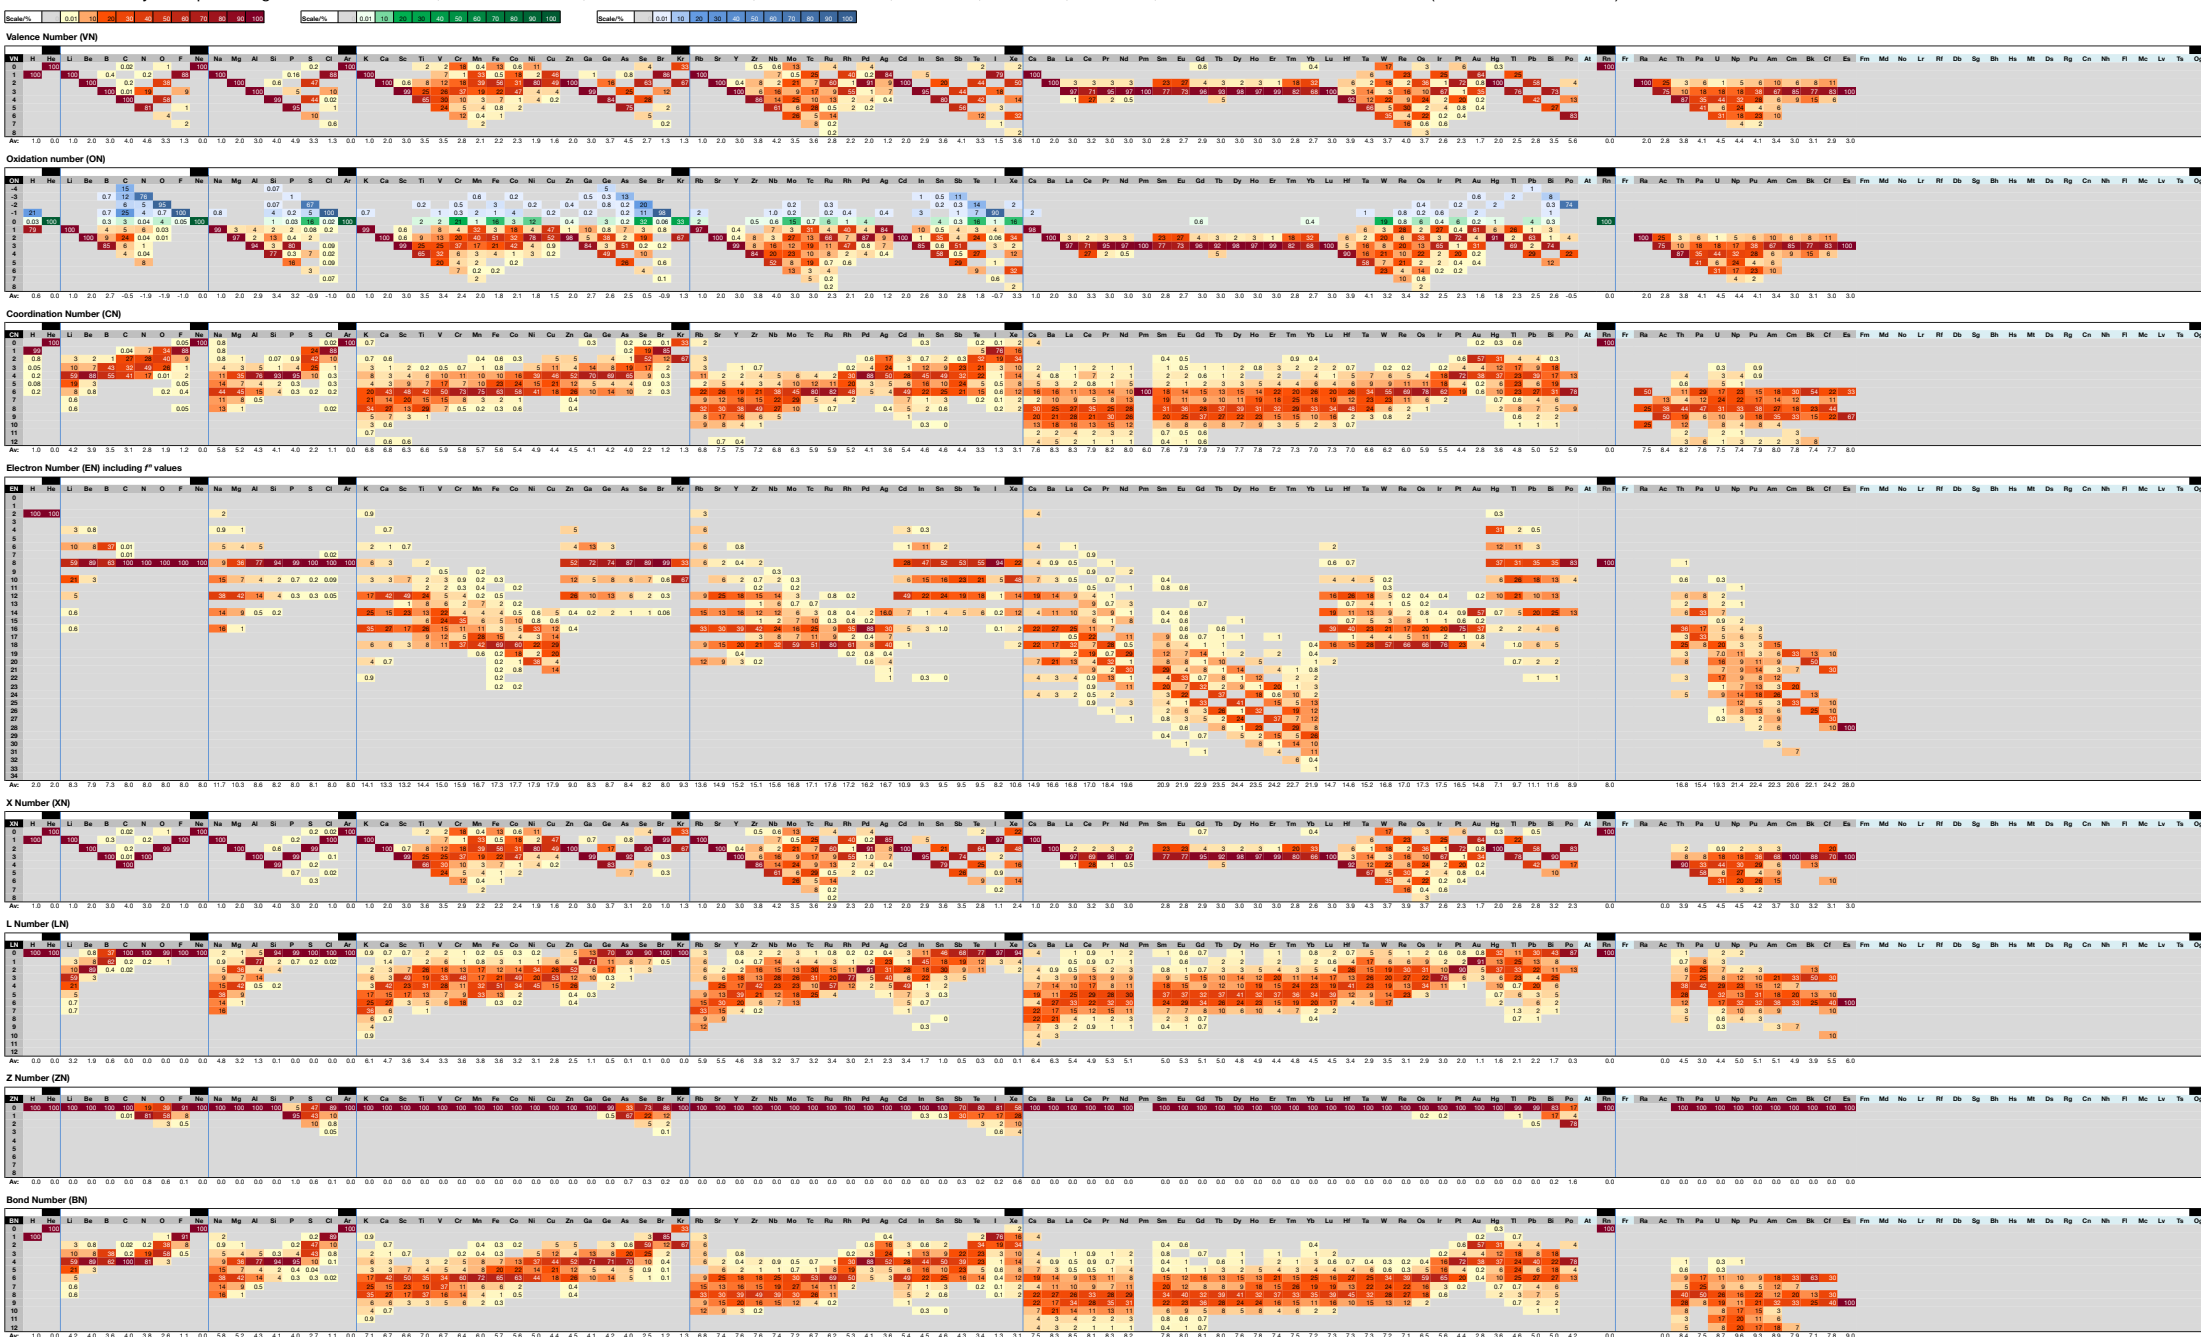

Supplement: d3dt03738j2.pdf [file d3dt03738j2.pdf]
