# Supplementary figures and images for: Chemdex: quantification and distributions of valence numbers, oxidation numbers, coordination numbers, electron numbers, and covalent bond classes for the elements
Source: Royal Society of Chemistry journal article supplement (doi:10.1039/d3dt03738j), 2023-12-13

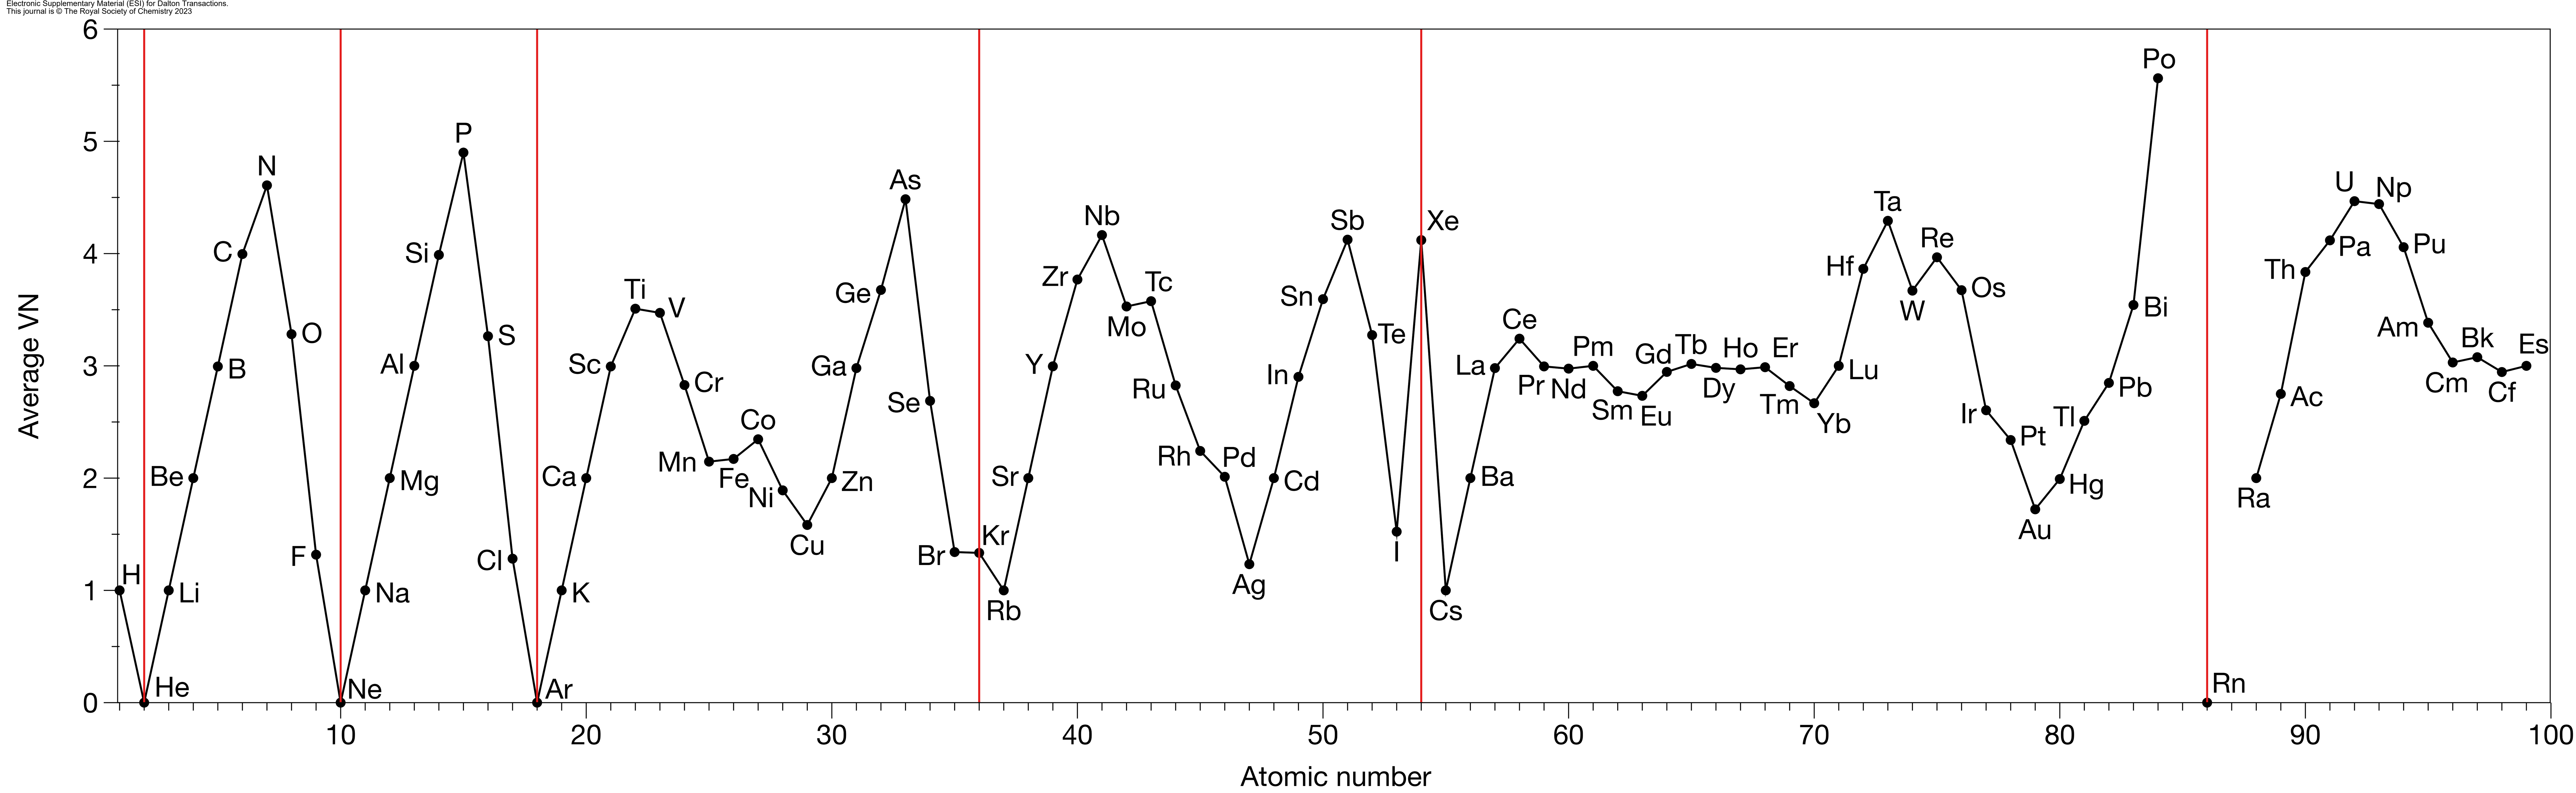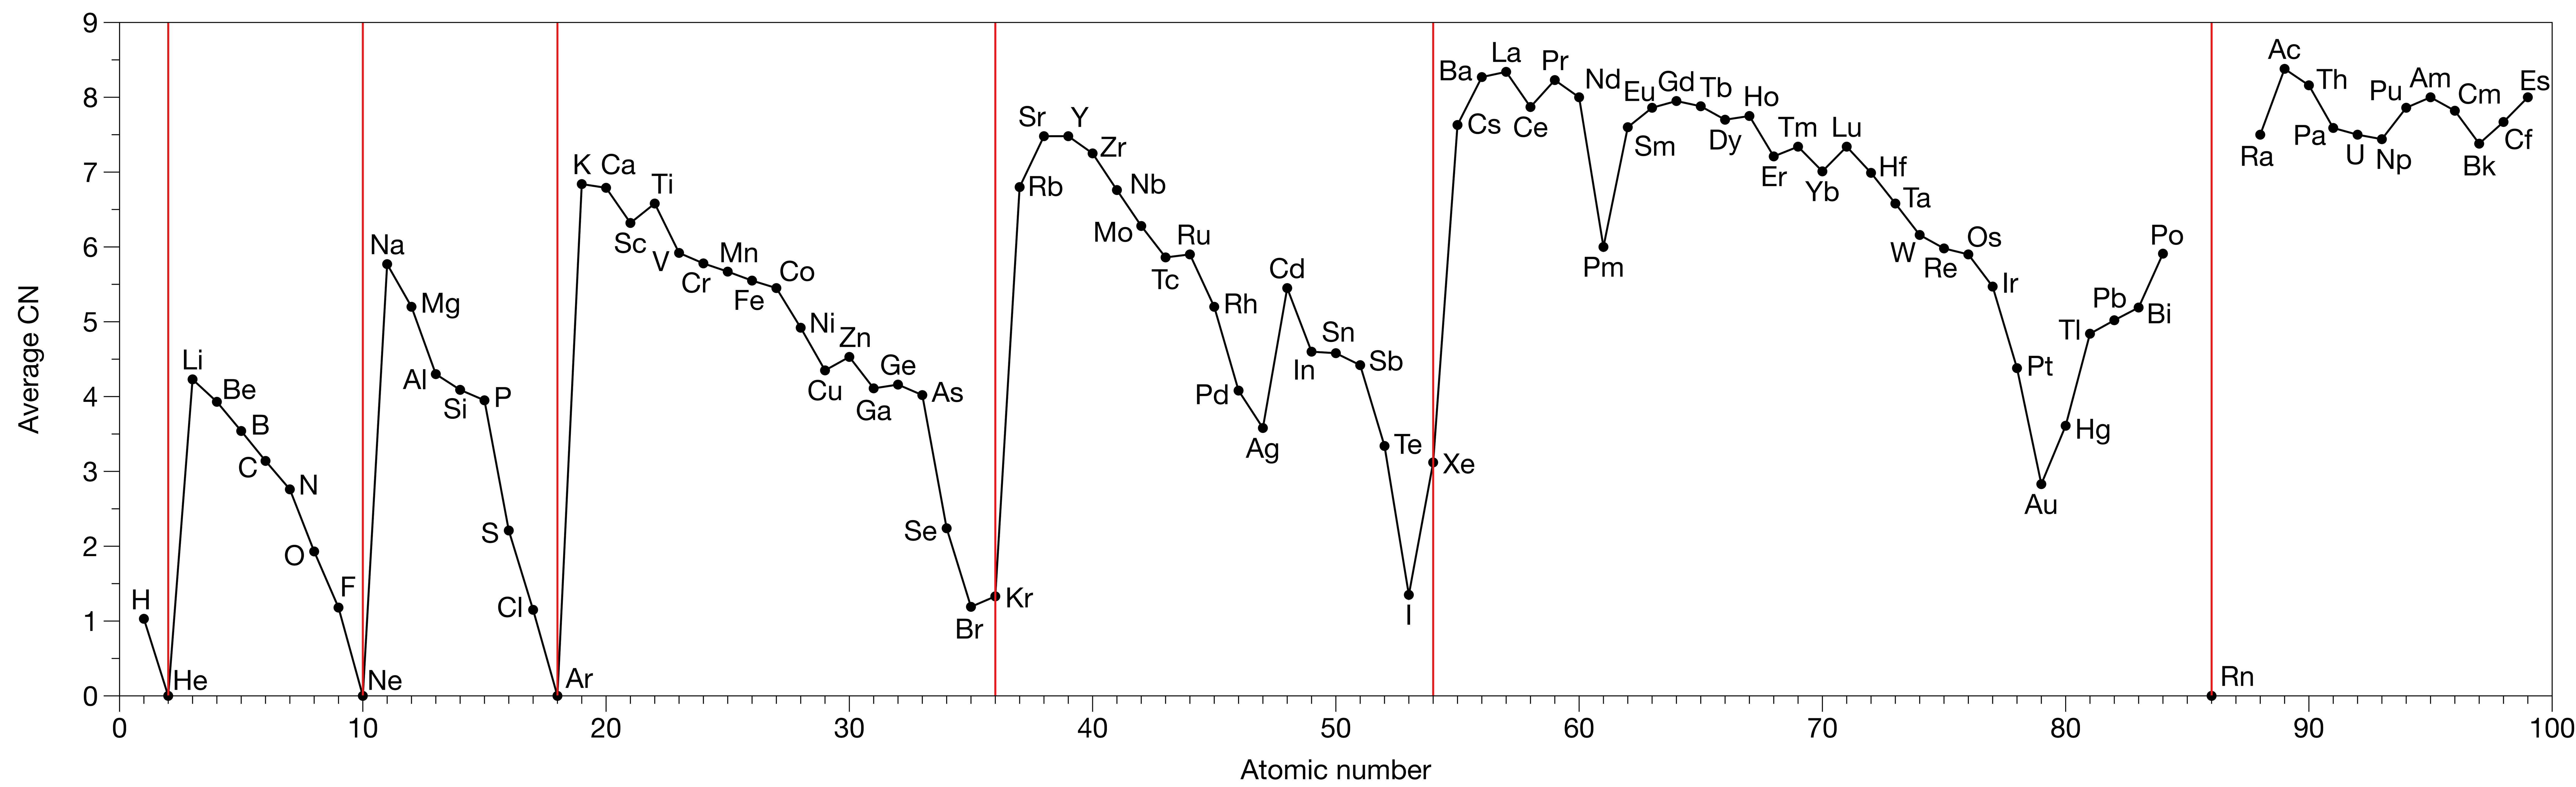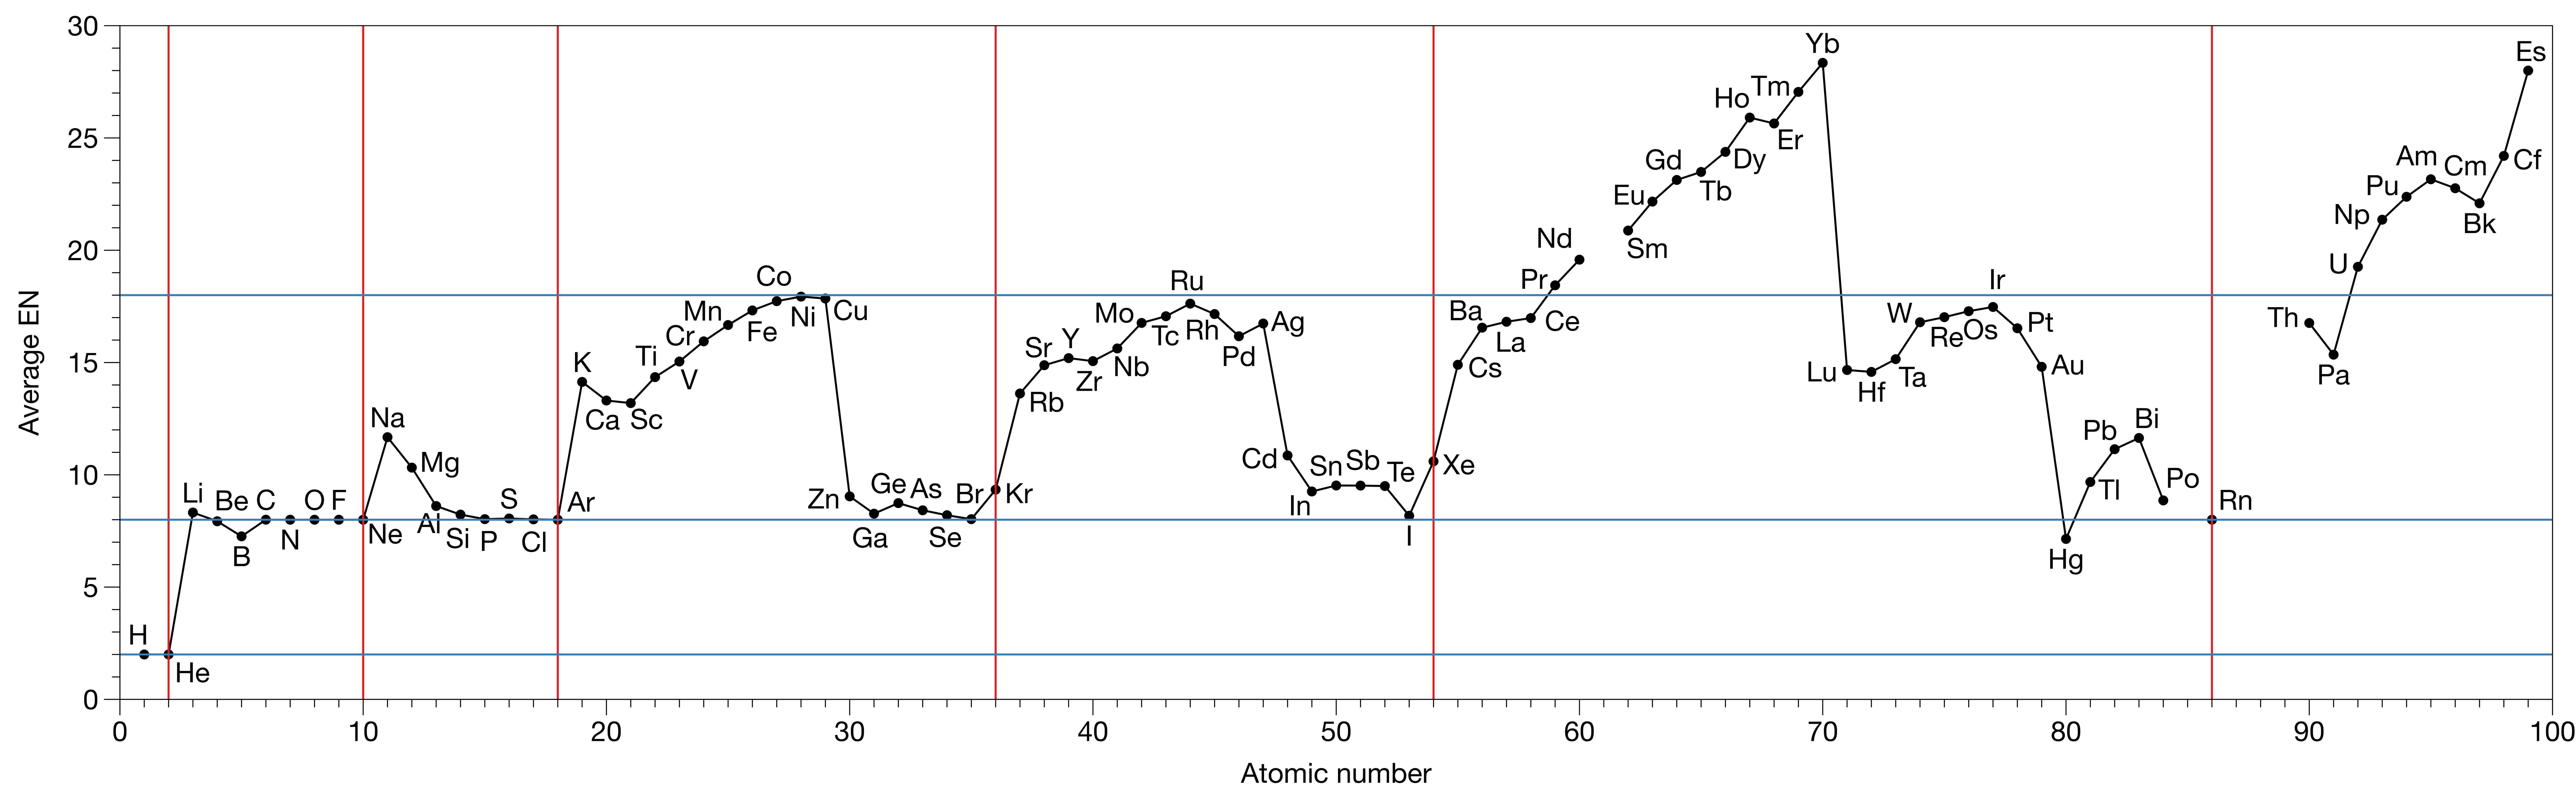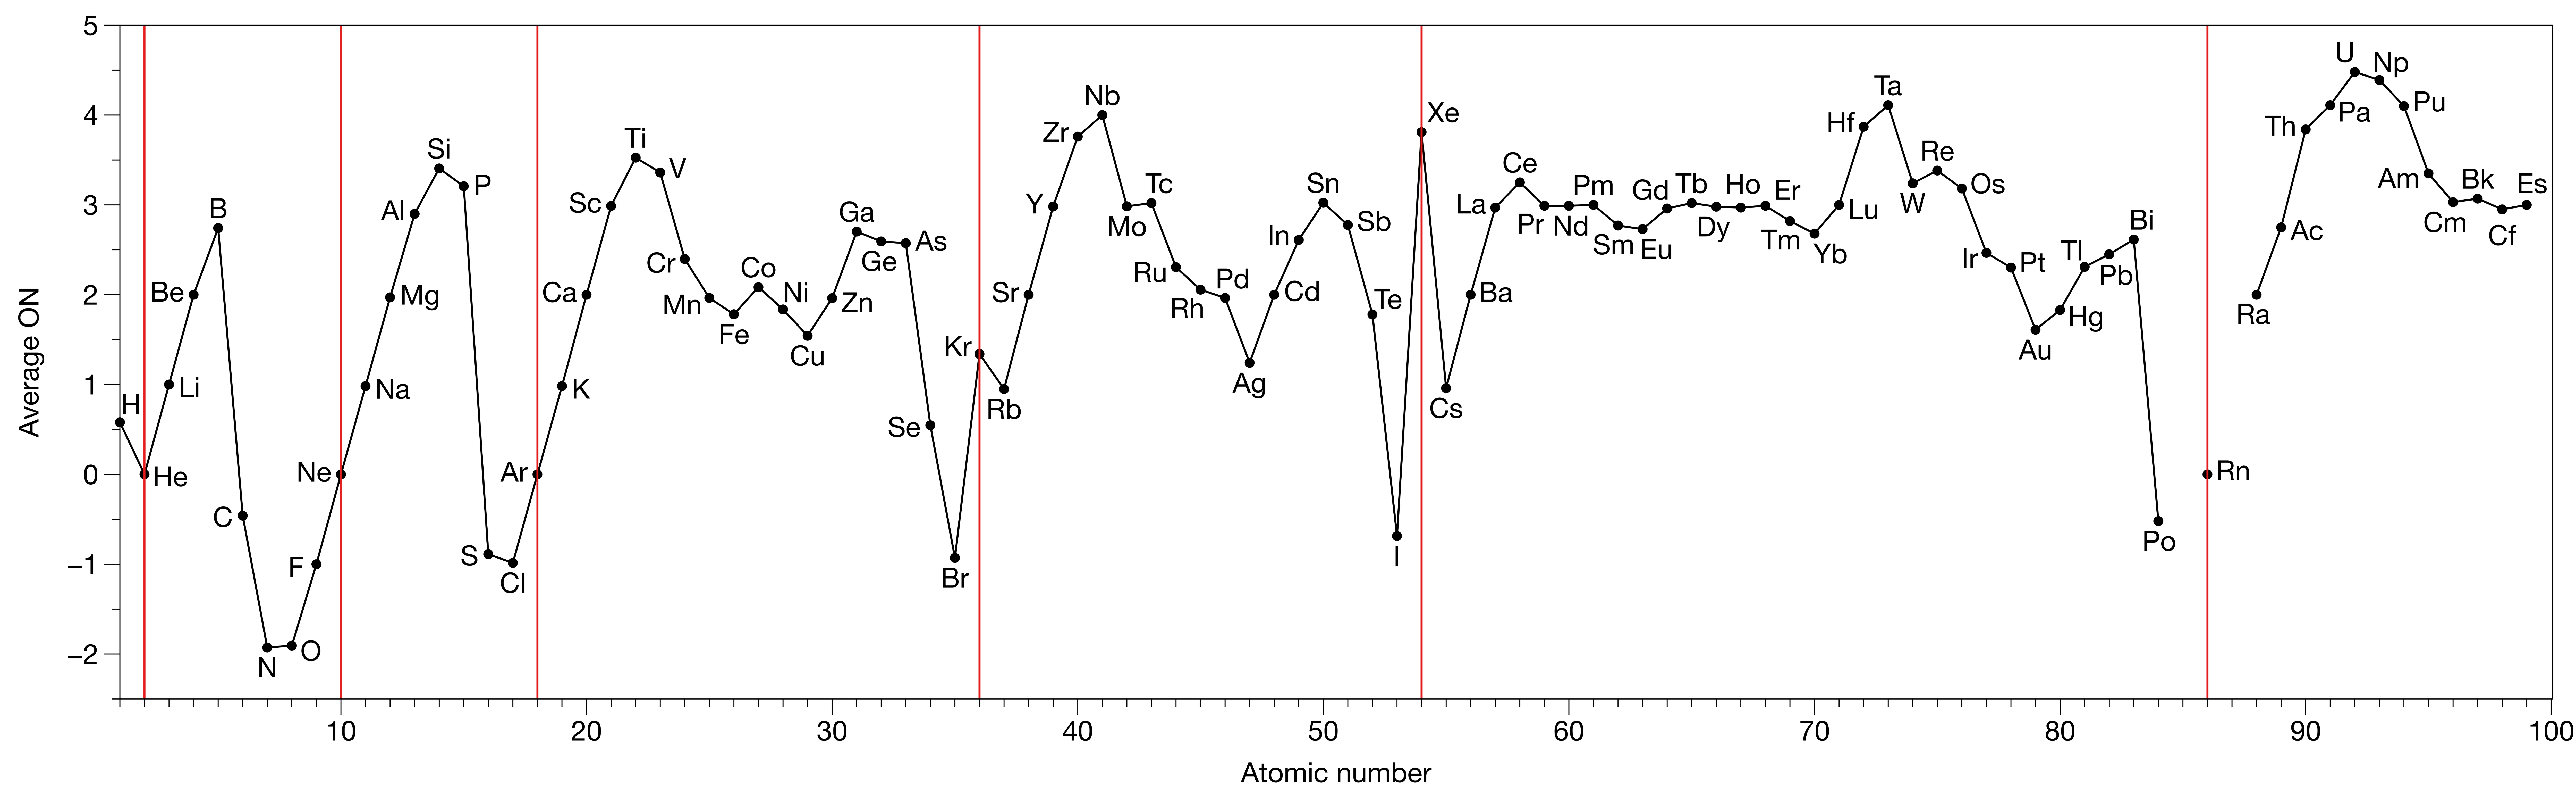



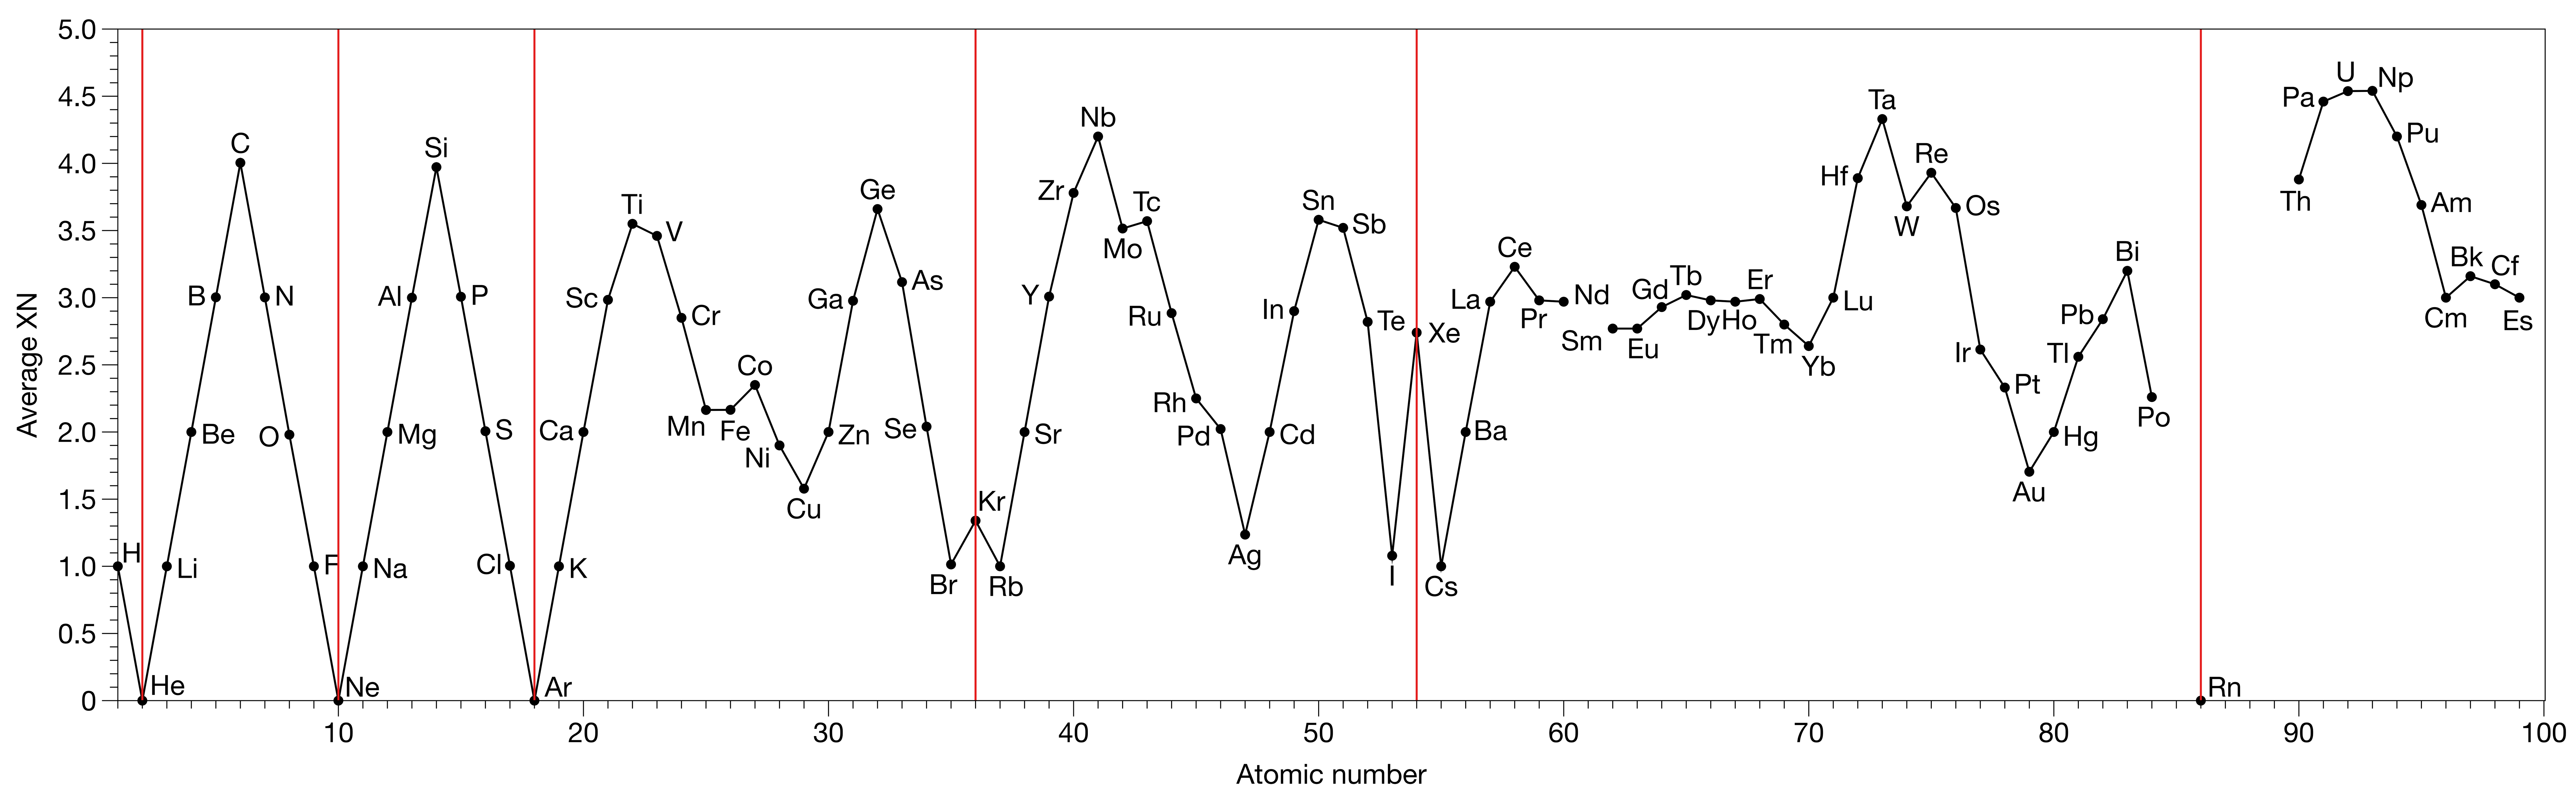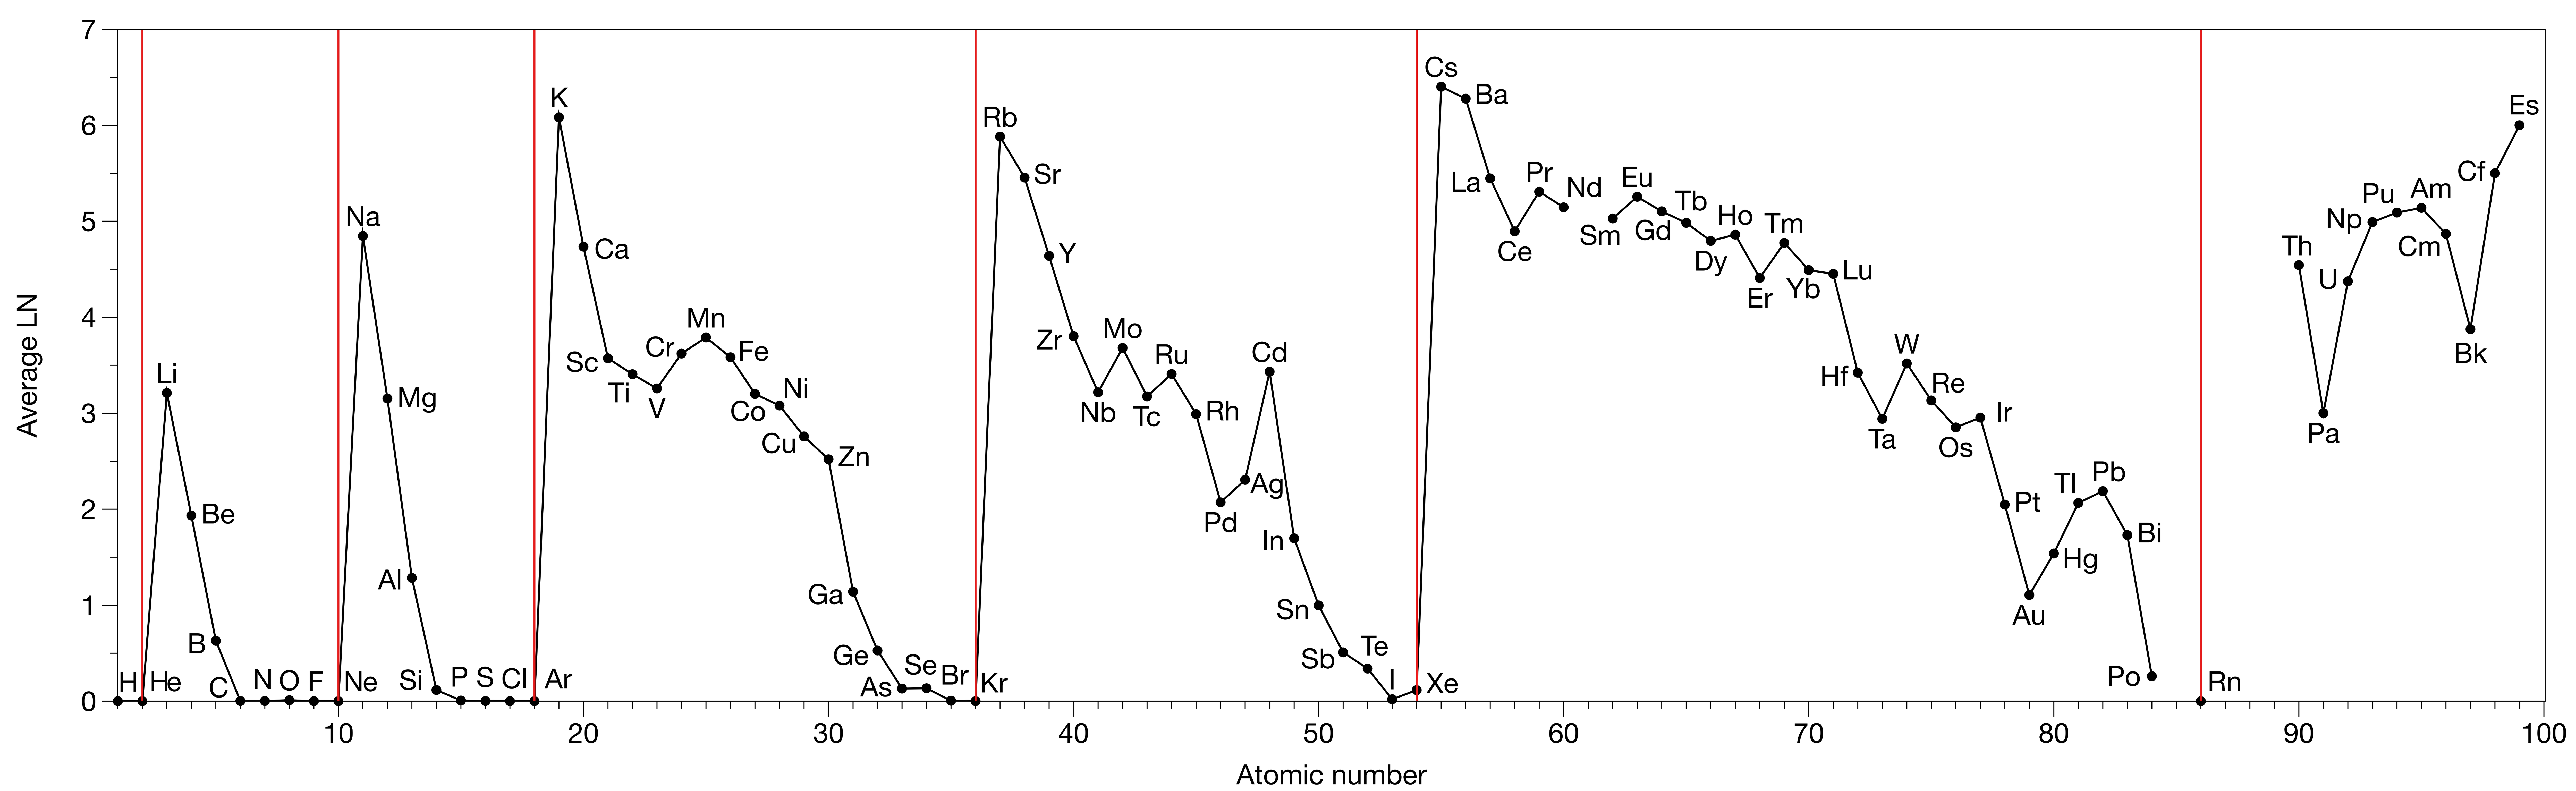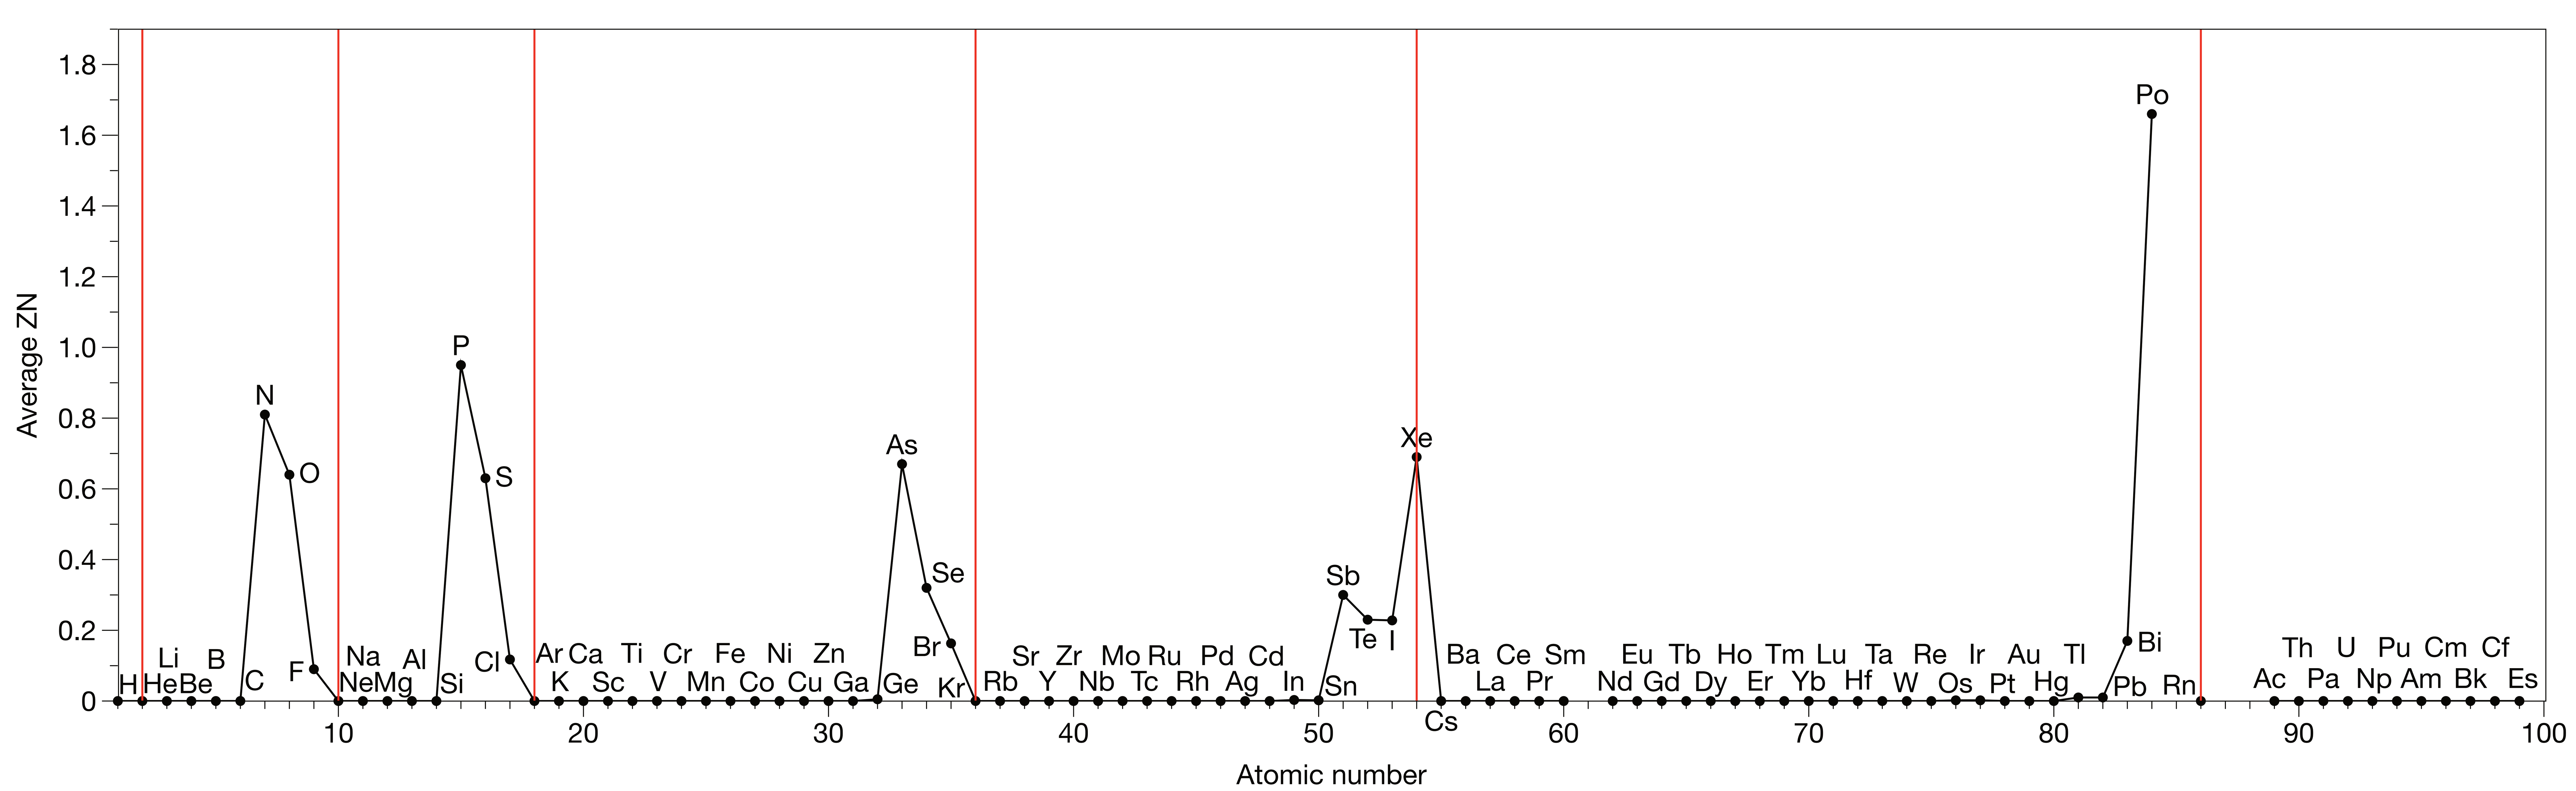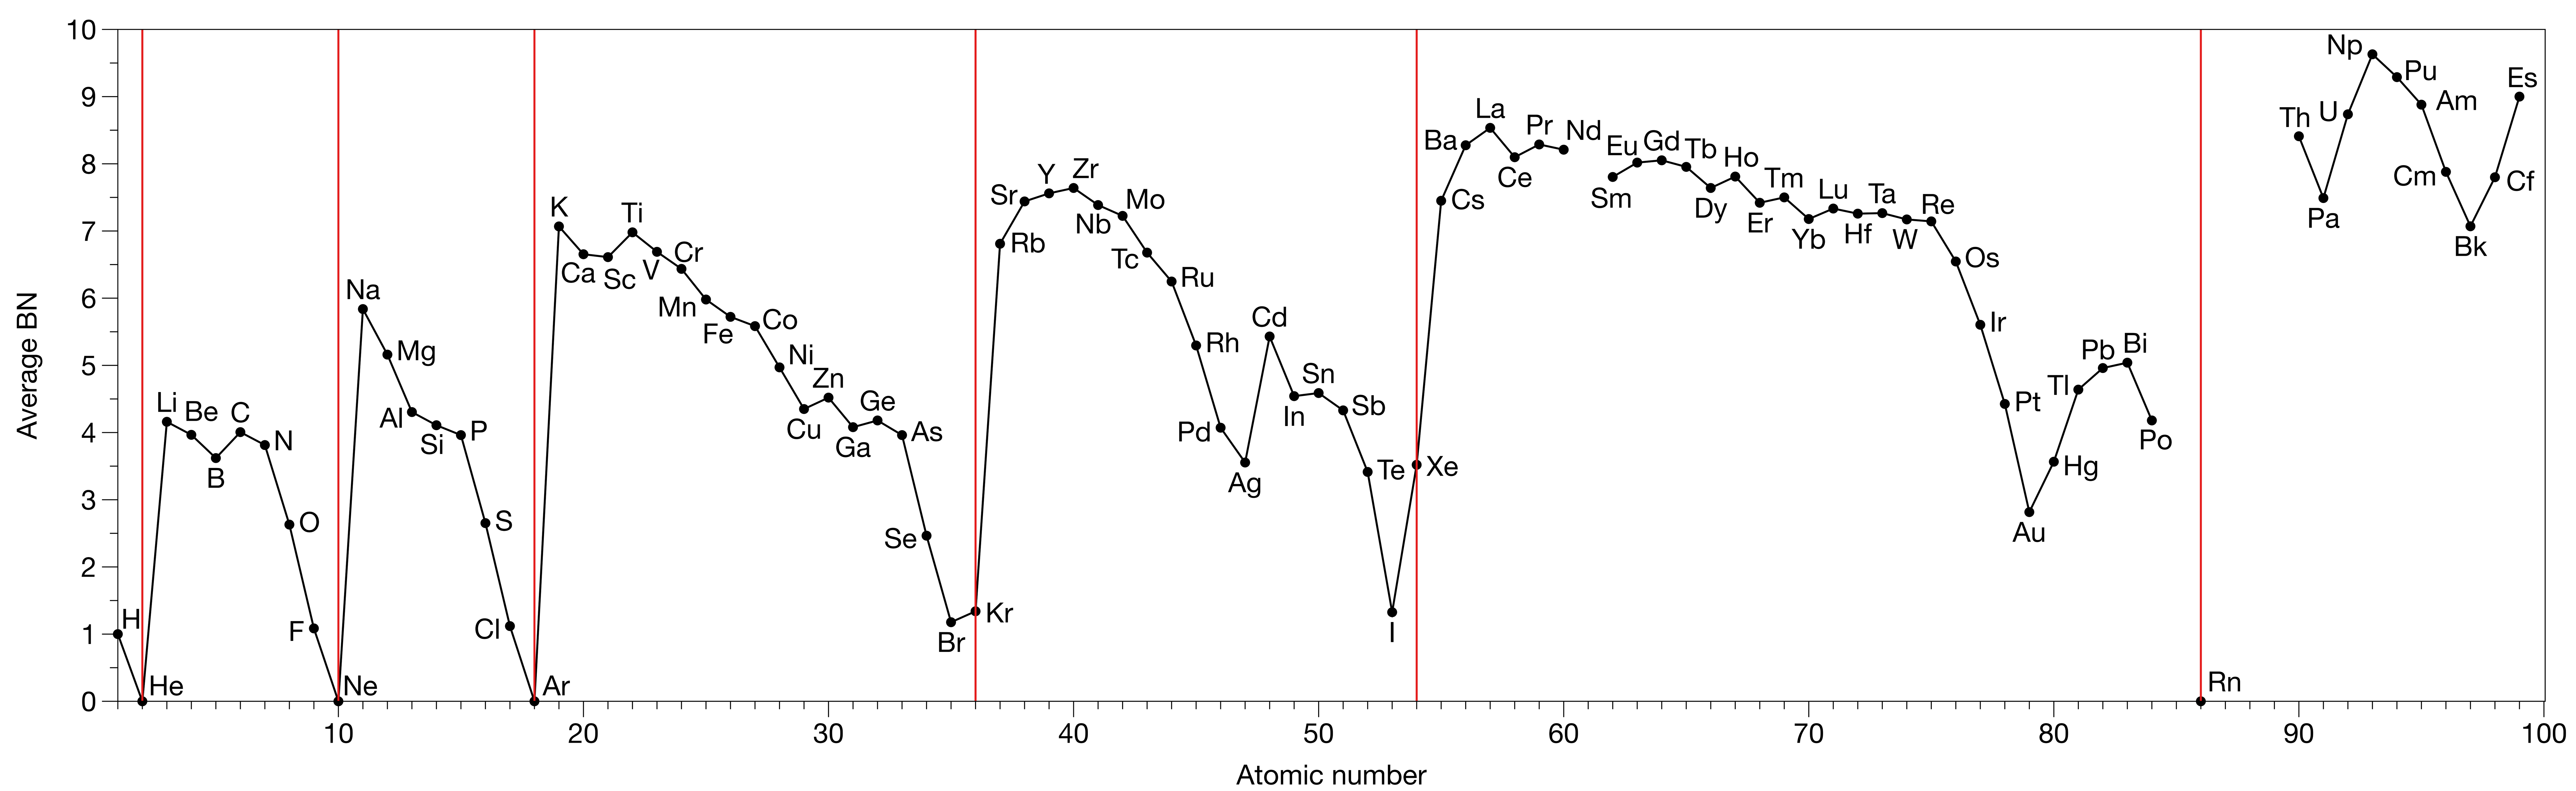

Supplement: d3dt03738j1.pdf [file d3dt03738j1.pdf]

# Oxidation Number (ON) plotted against Coordination Number (CN)

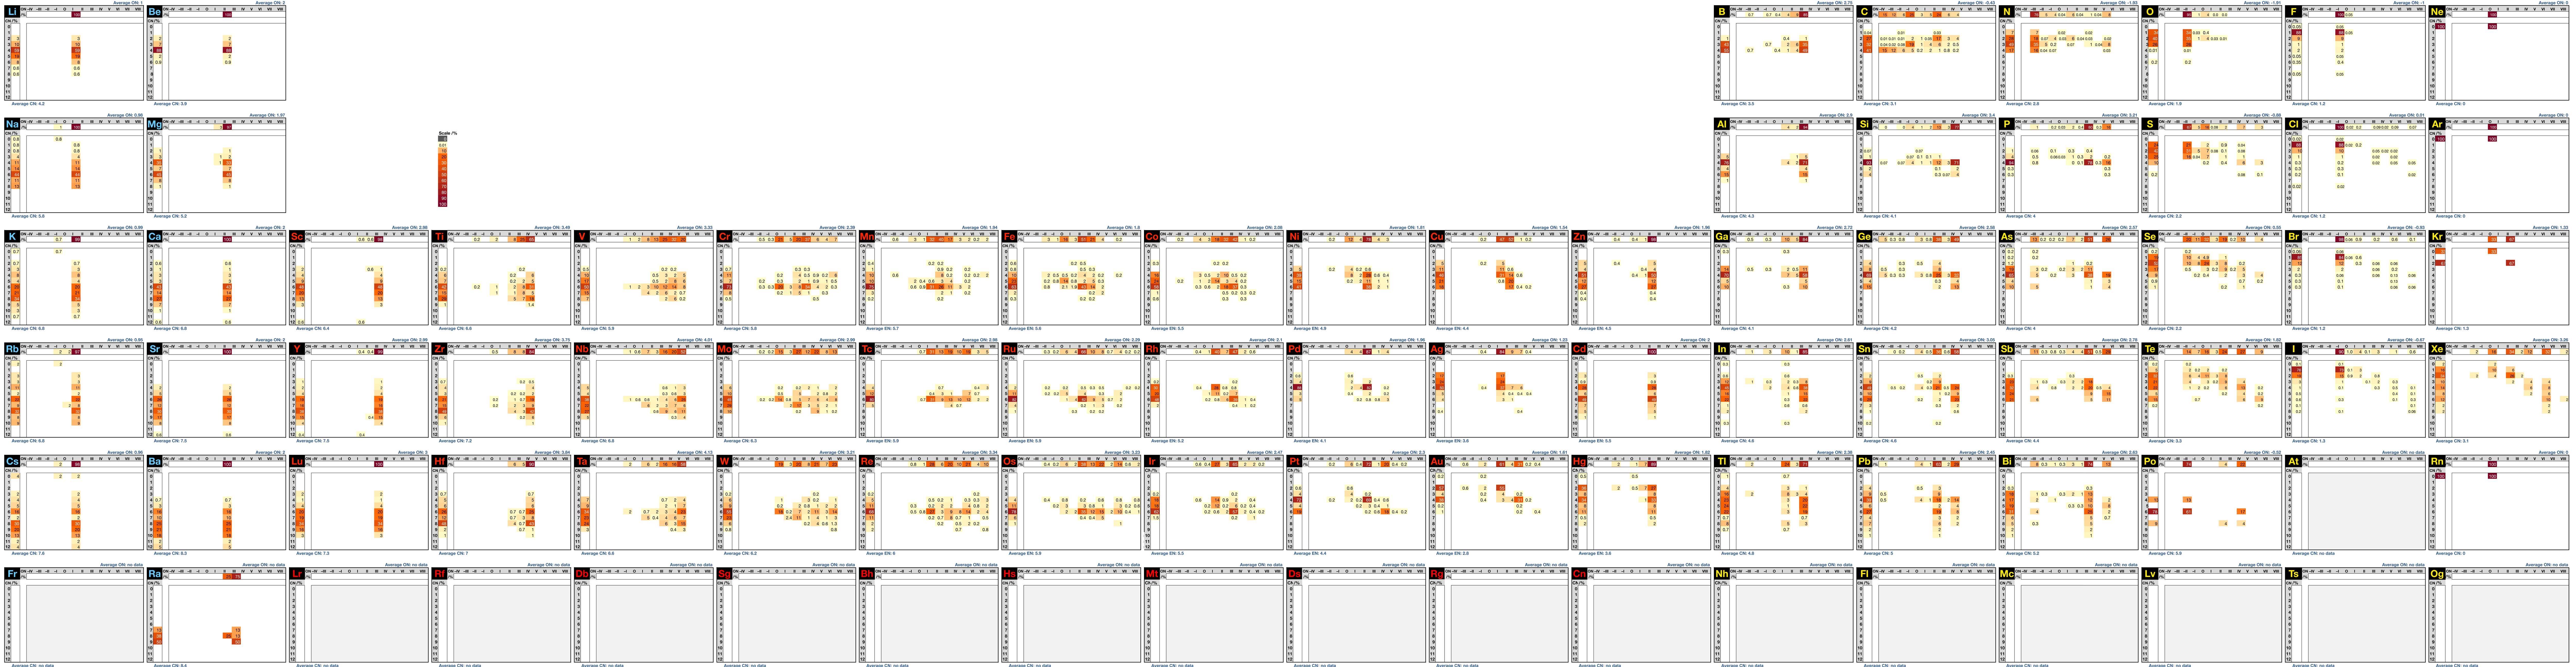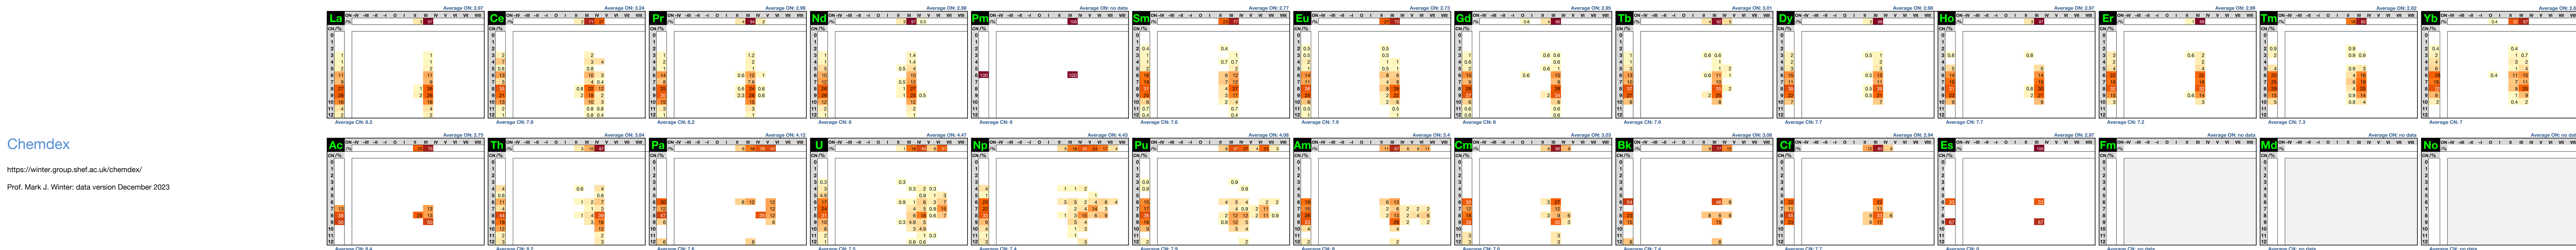

Supplement: d3dt03738j3.pdf [file d3dt03738j3.pdf]

Oxidation Number (ON) plotted against Electron Number (EN)

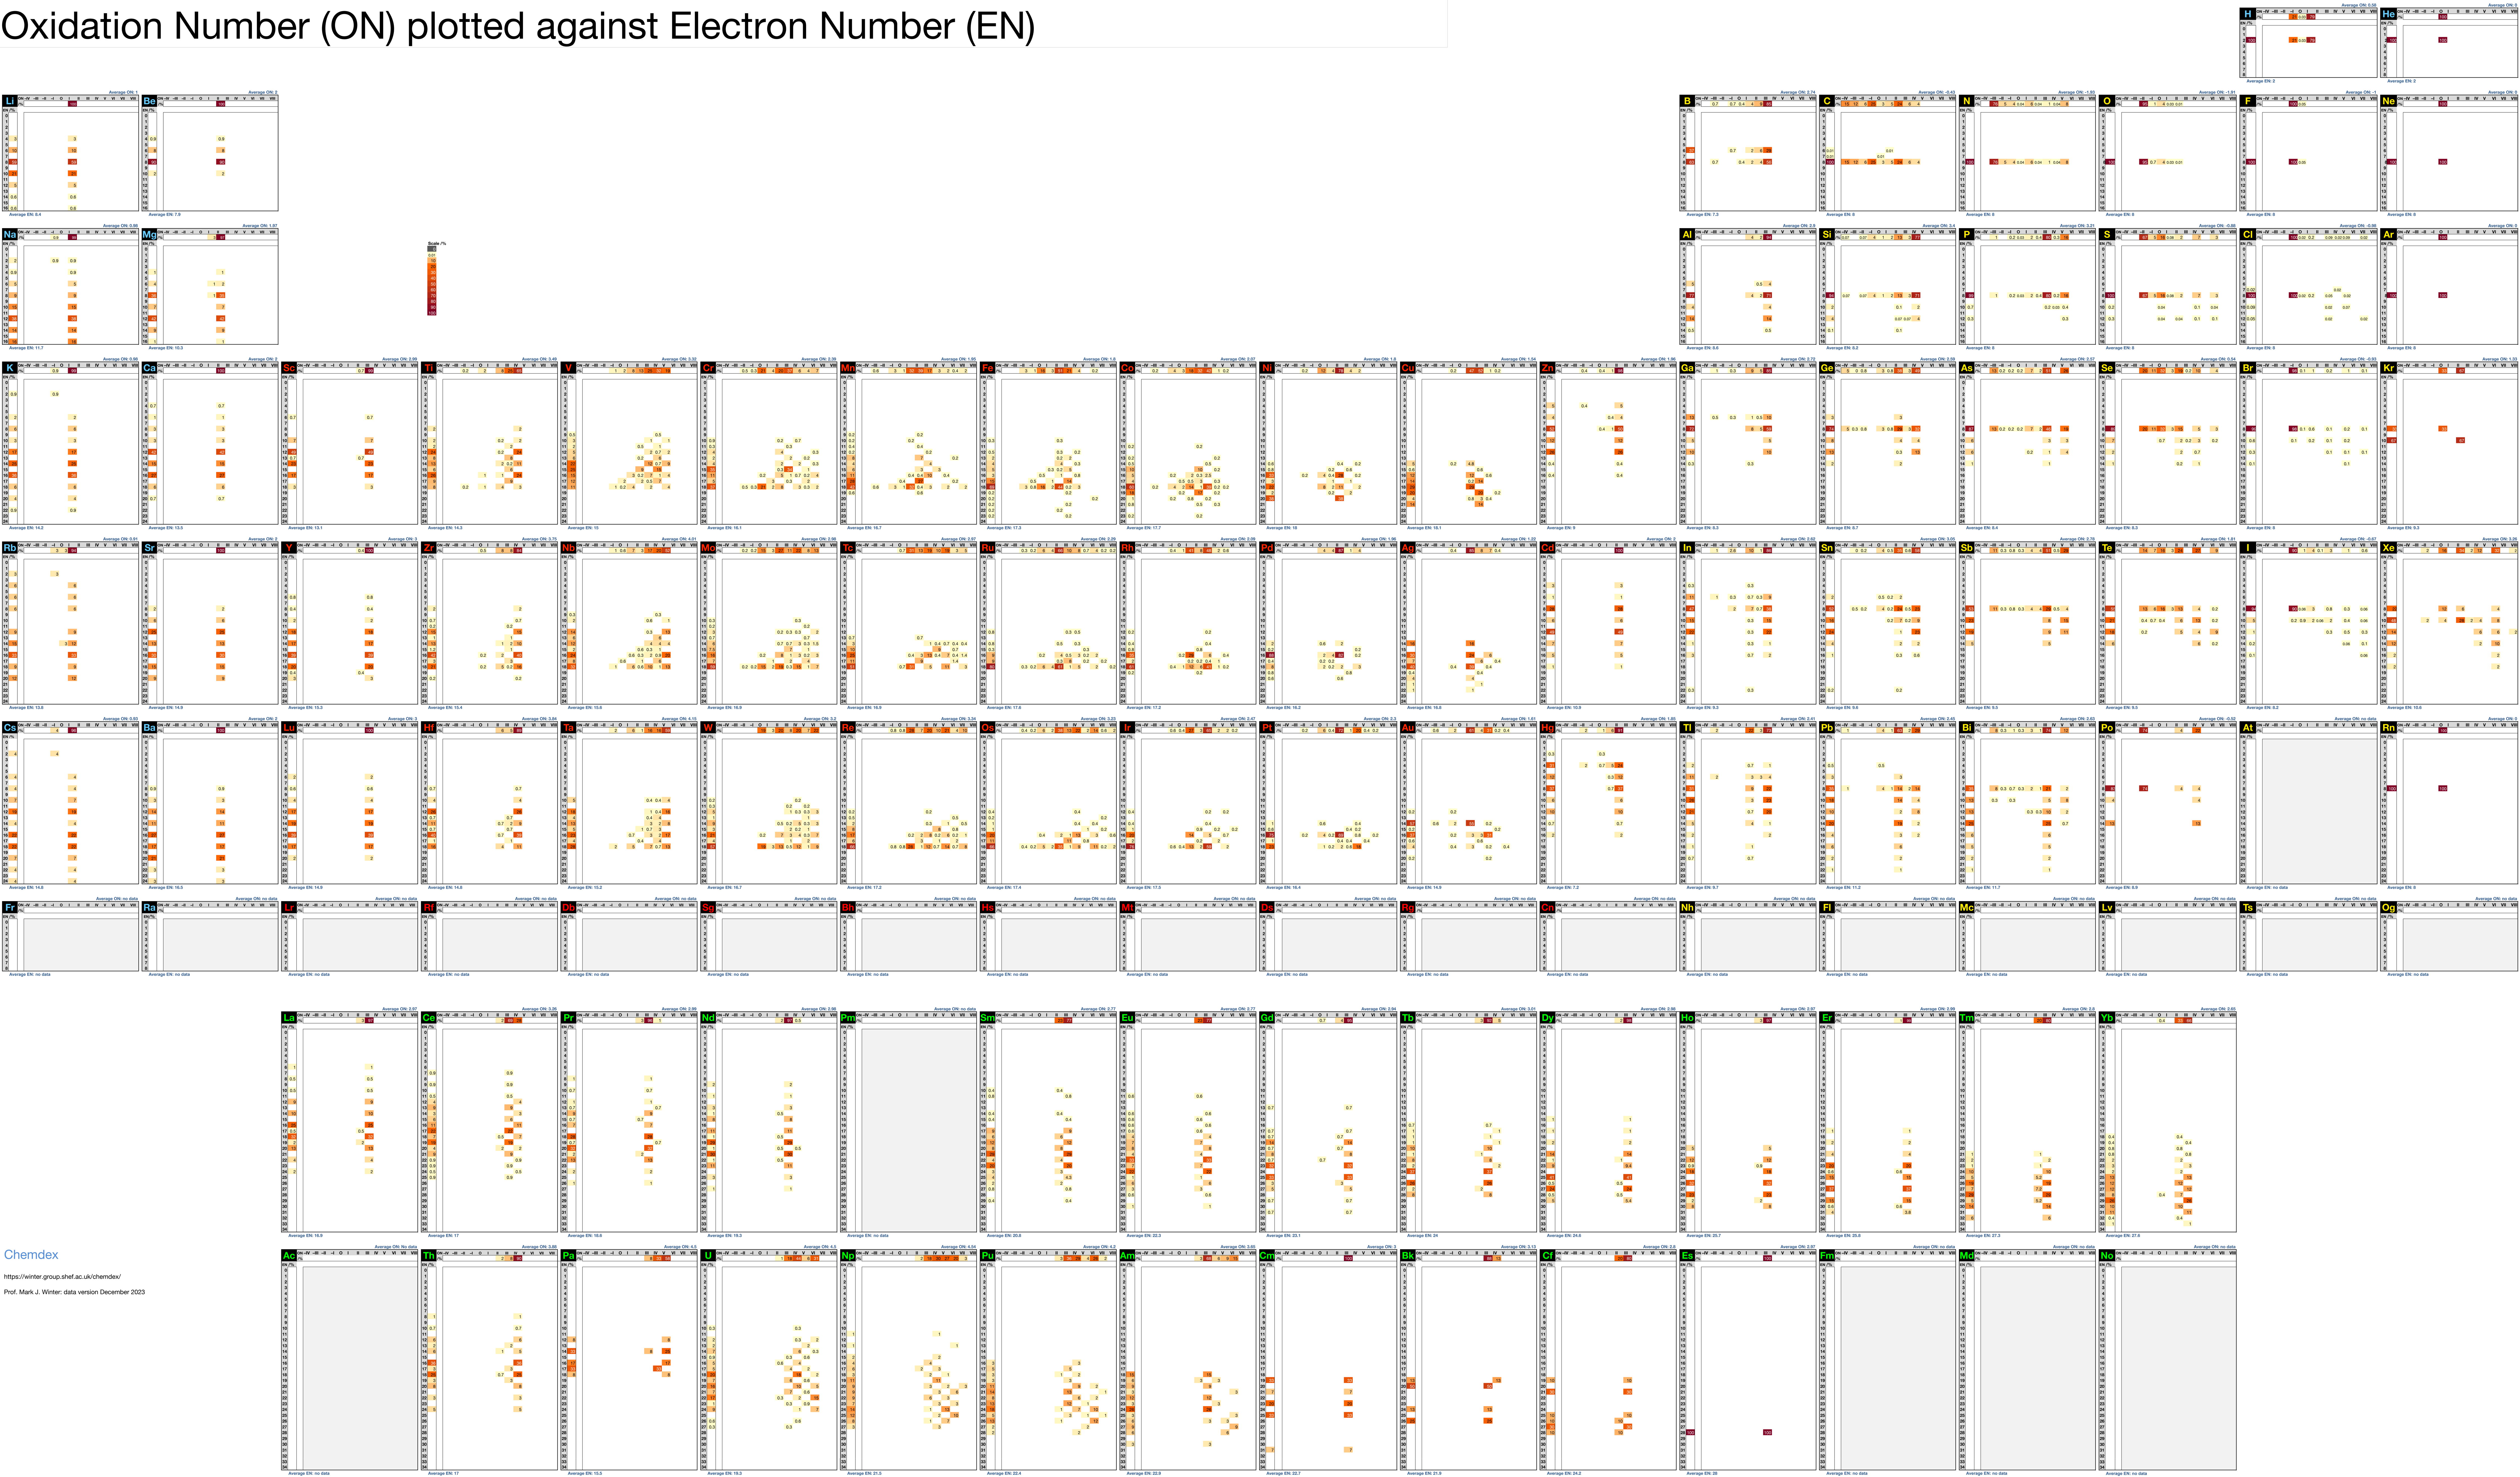

Supplement: d3dt03738j4.pdf [file d3dt03738j4.pdf]

## Valence Number (VN) plotted against Coordination Number (CN)

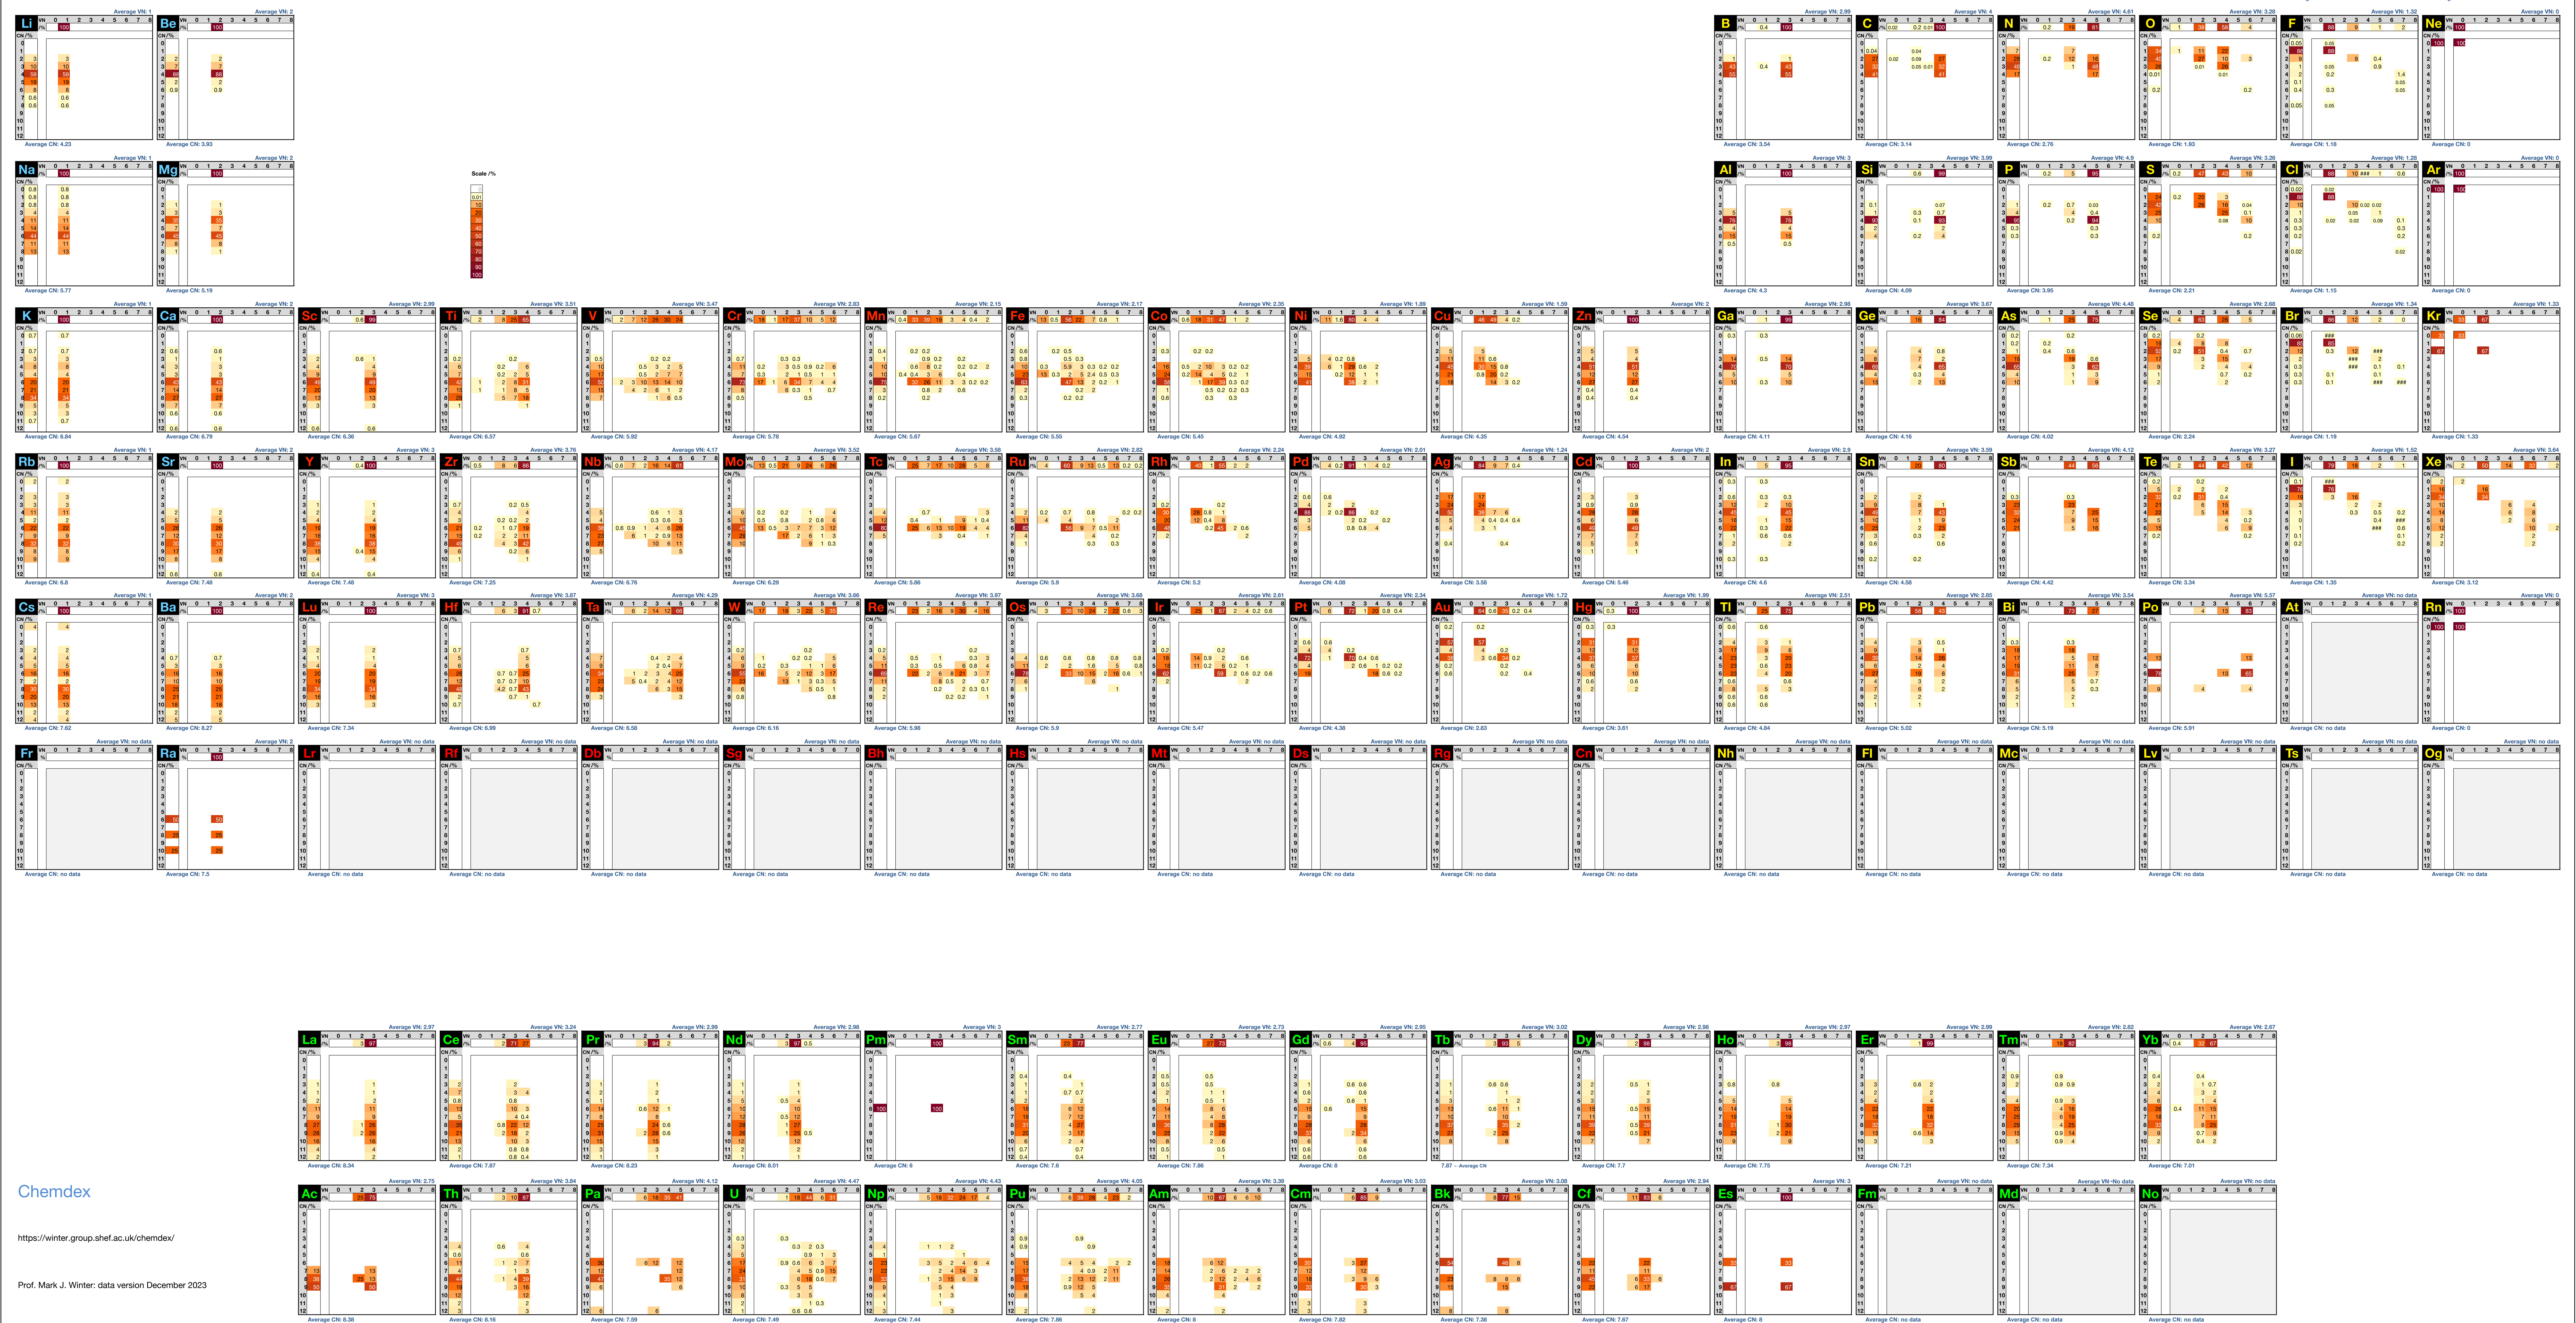

Supplement: d3dt03738j5.pdf [file d3dt03738j5.pdf]

# Valence Number (VN) plotted against Electron Number (EN)

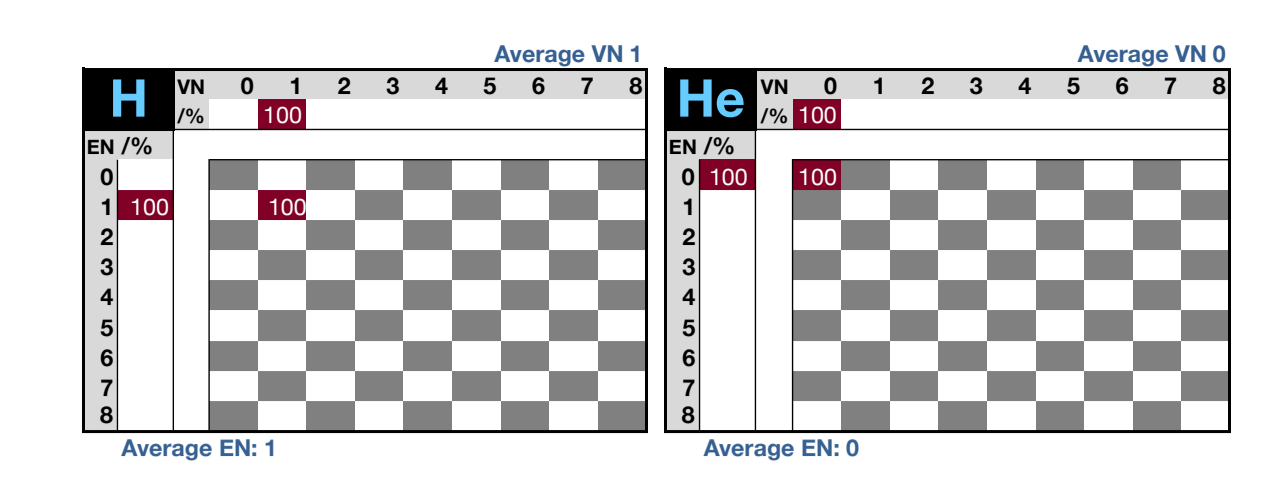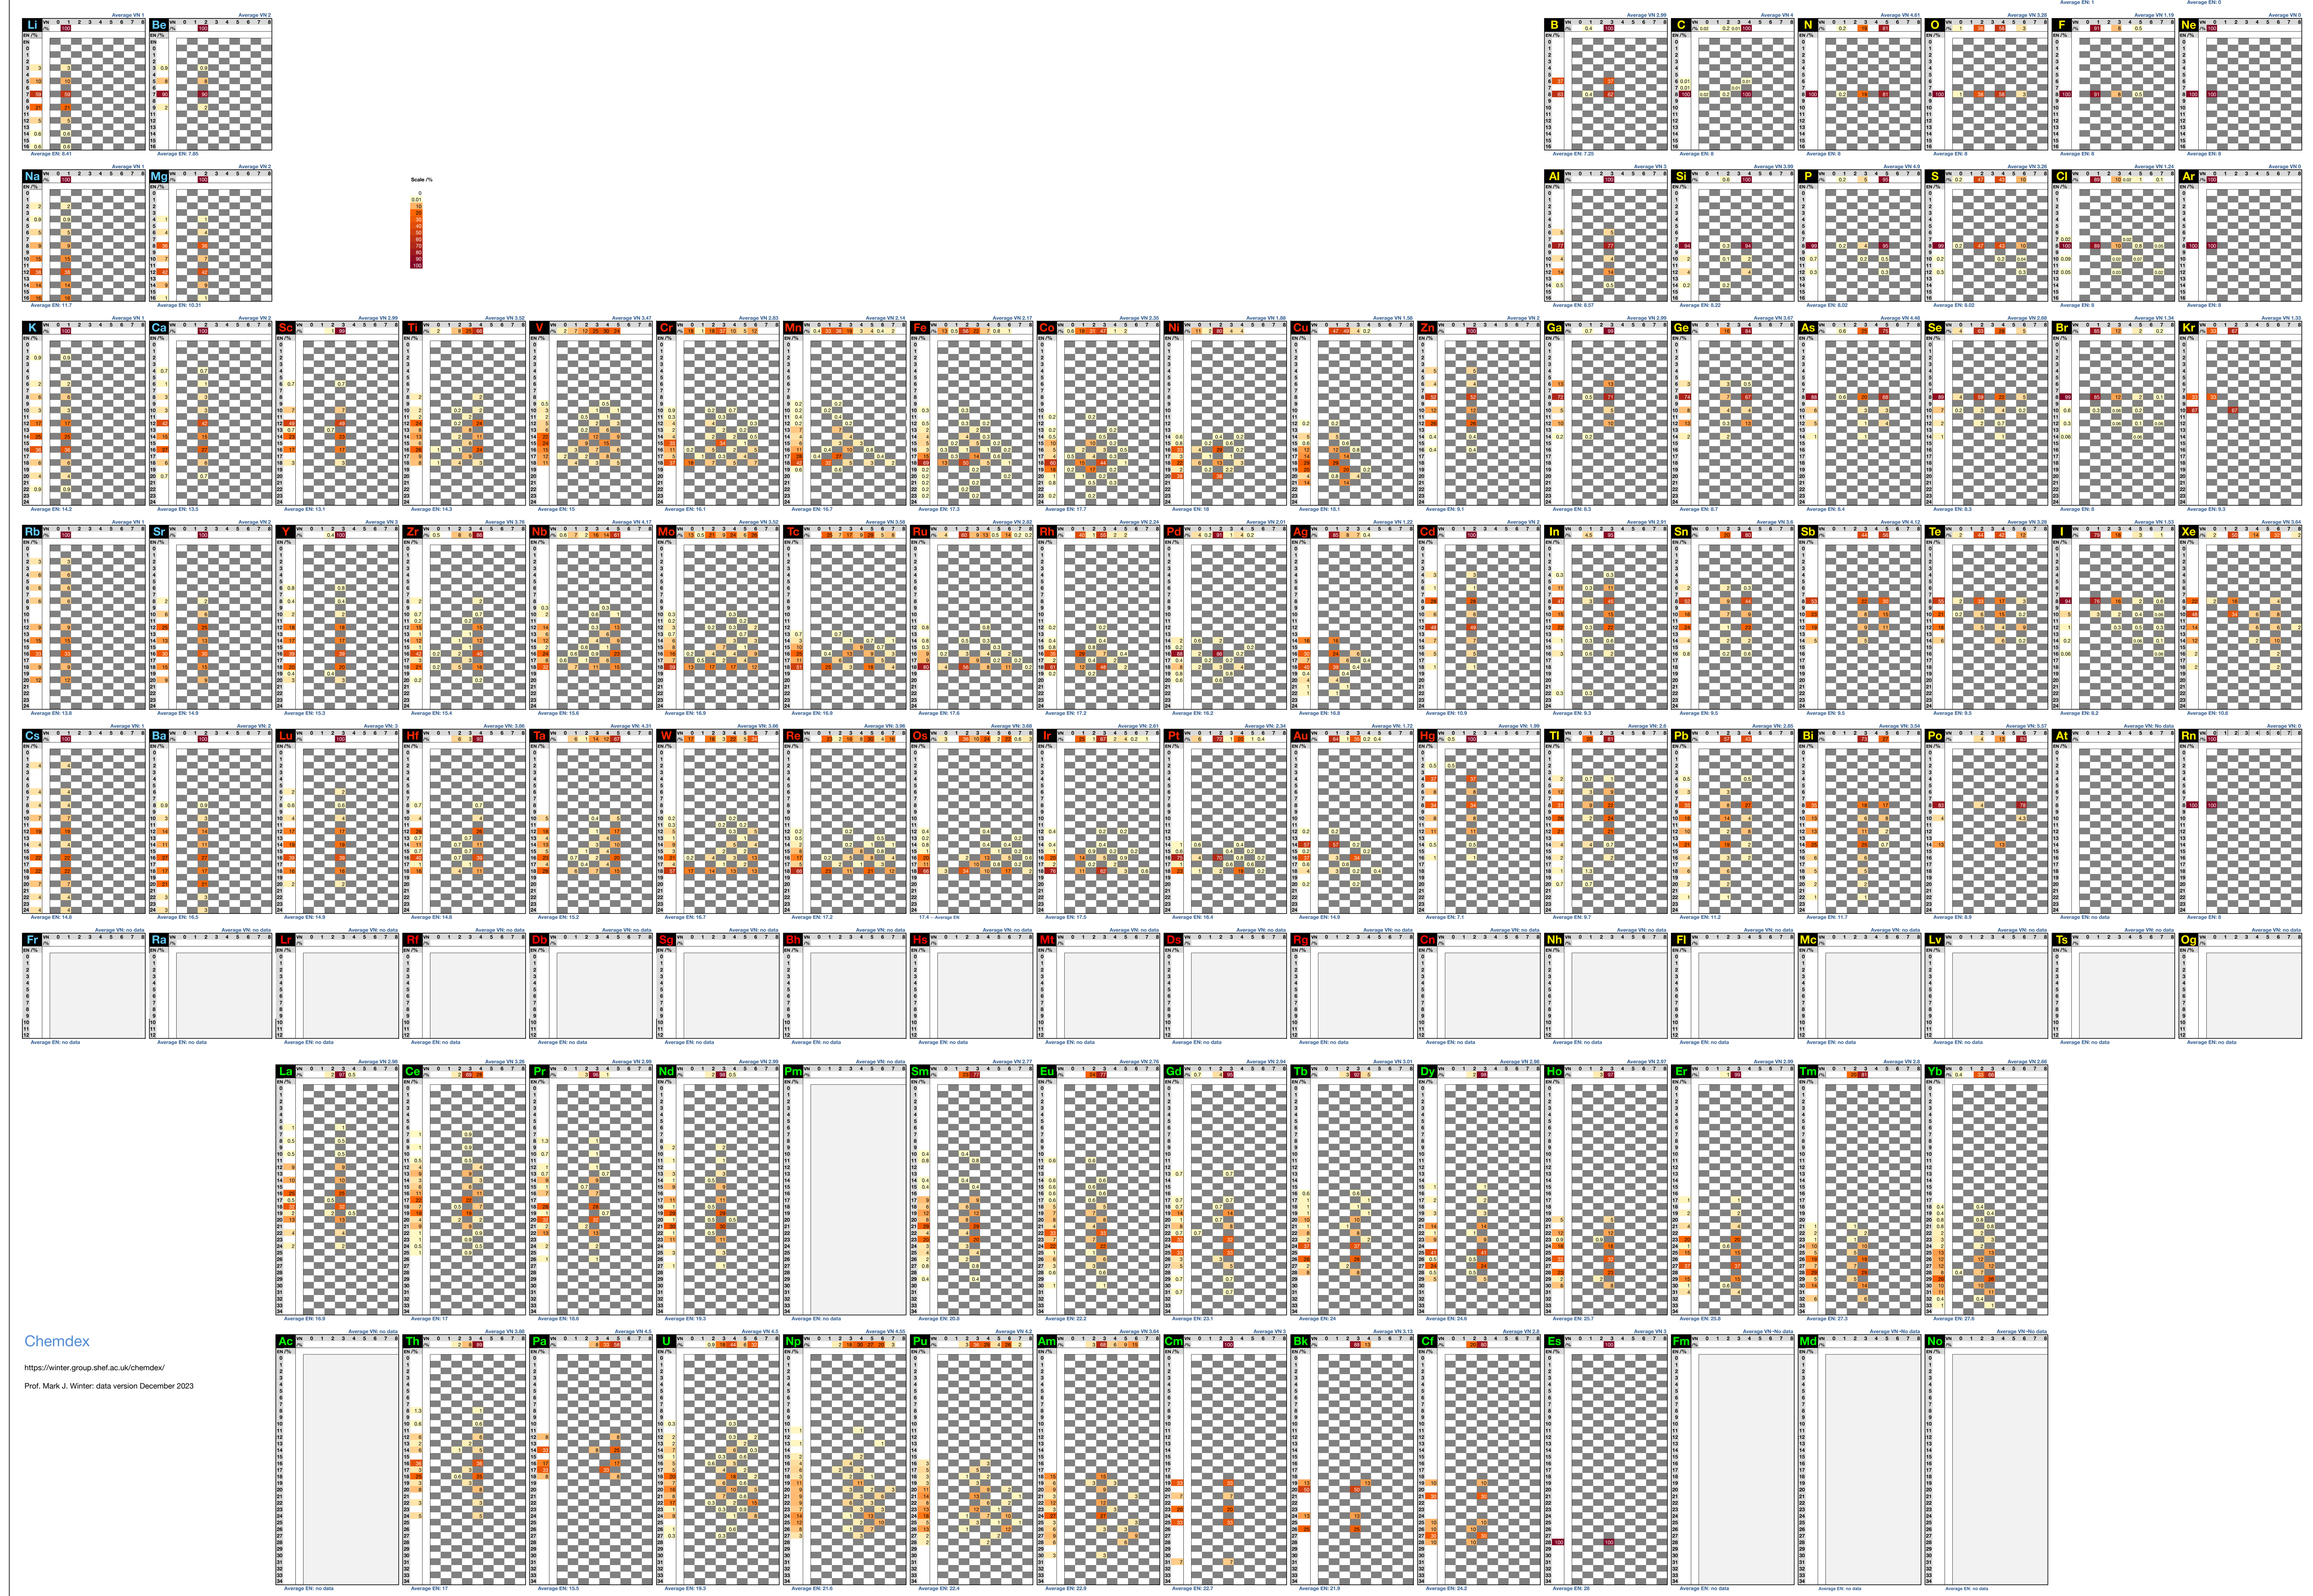

Supplement: d3dt03738j6.pdf [file d3dt03738j6.pdf]
